# Supplementary material for: Ultra-robust stretchable electrode for e-skin: in situ assembly using a nanofiber scaffold and liquid metal to mimic water-to-net interaction
Source: Research Square preprint supplement (doi:10.21203/rs.3.rs-386313/v1), 2021-04-15
Supplement: Supplementary file 2 [file 1c391bf31c429b1662a752c7.docx]

Supplementary Materials for

**Ultra-robust stretchable electrode for e-skin:** **in situ assembly using a nanofiber scaffold and liquid metal to mimic water-to-net interaction**

Jinwei Cao, Fei Liang, Huayang Li, Xin Li, Youjun Fan, Yiming Yin, Fali Li, Jin Xu, Hanfang Feng, Dan Xu, Huali Yang, Yiwei Liu, Run-Wei Li* & Guang Zhu*

*email: [runweili@nimte.ac.cn](mailto:runweili@nimte.ac.cn) (R.L.); [Guang.Zhu@nottingham.edu.cn](mailto:Guang.Zhu@nottingham.edu.cn) (G.Z.)

**Supplementary Figures**


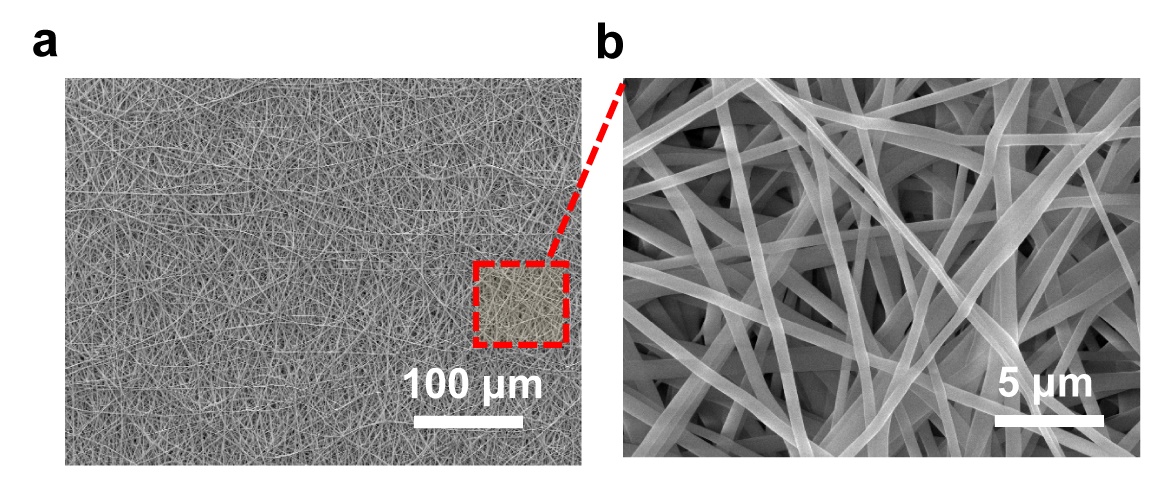


**Supplementary Figure 1. Characterization of TPU nanofiber scaffold. a** SEM images of TPU scaffold fabricated by electrospinning, and (**b**) the magnified morphology of TPU nanofiber with an average diameter of ~600 nm.


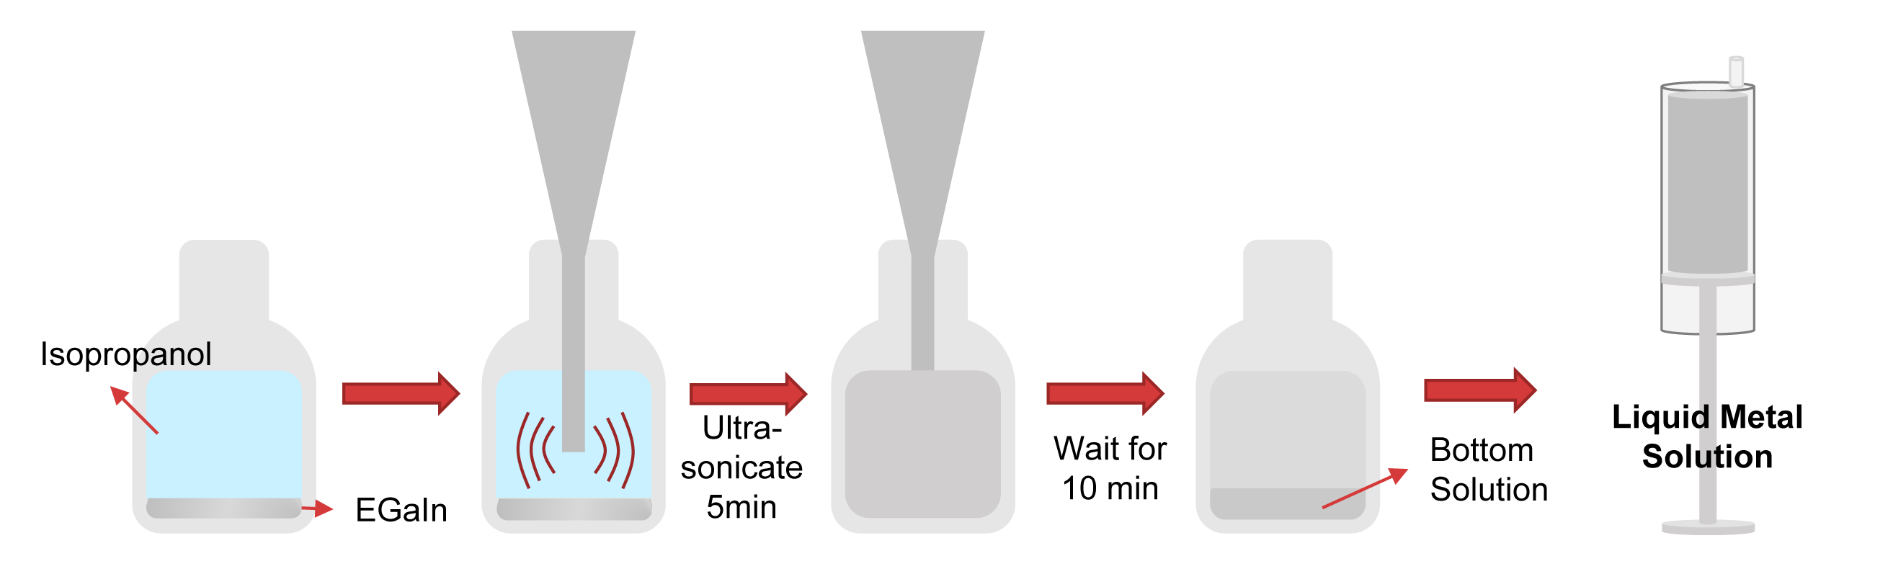


**Supplementary Figure 2.** Fabrication process of liquid metal nanoparticles in isopropanol solution for electrospraying.


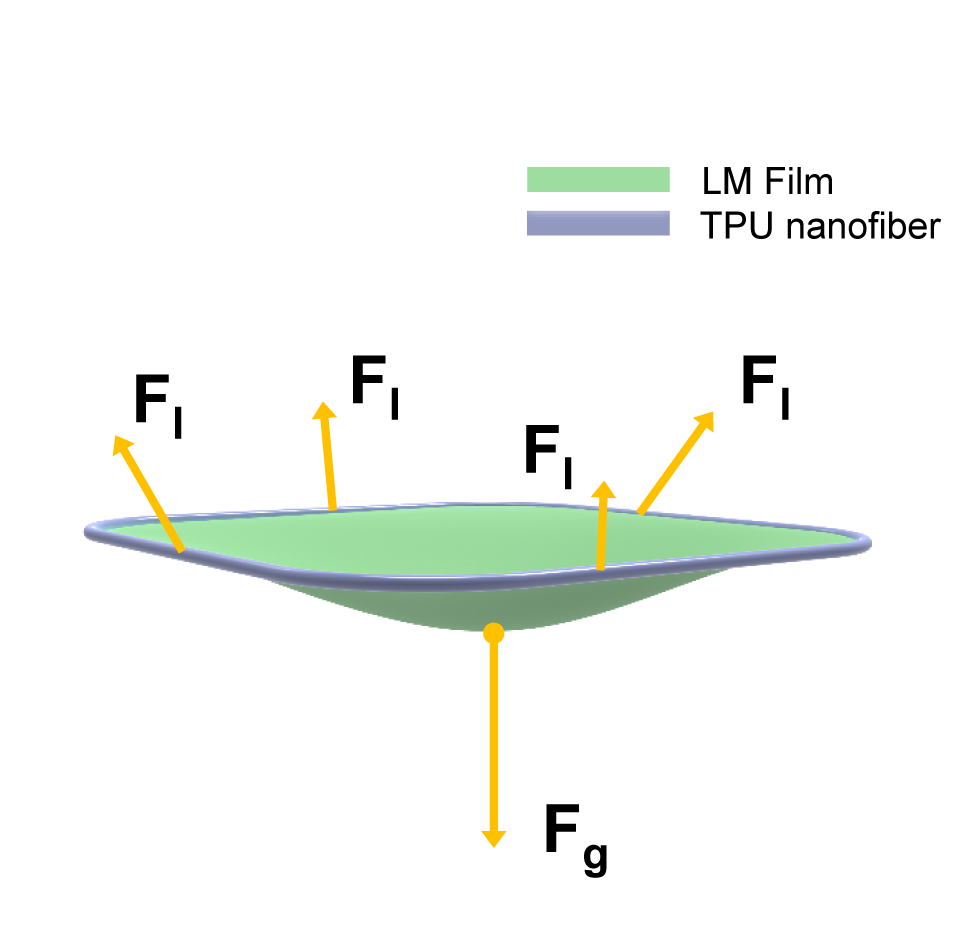


**Supplementary Figure 3. Mechanism of the dynamic balance of LM film on TPU nanofiber scaffold**: there are two forces working on the LM: Laplace pressure difference Fl and gravitational force Fg.


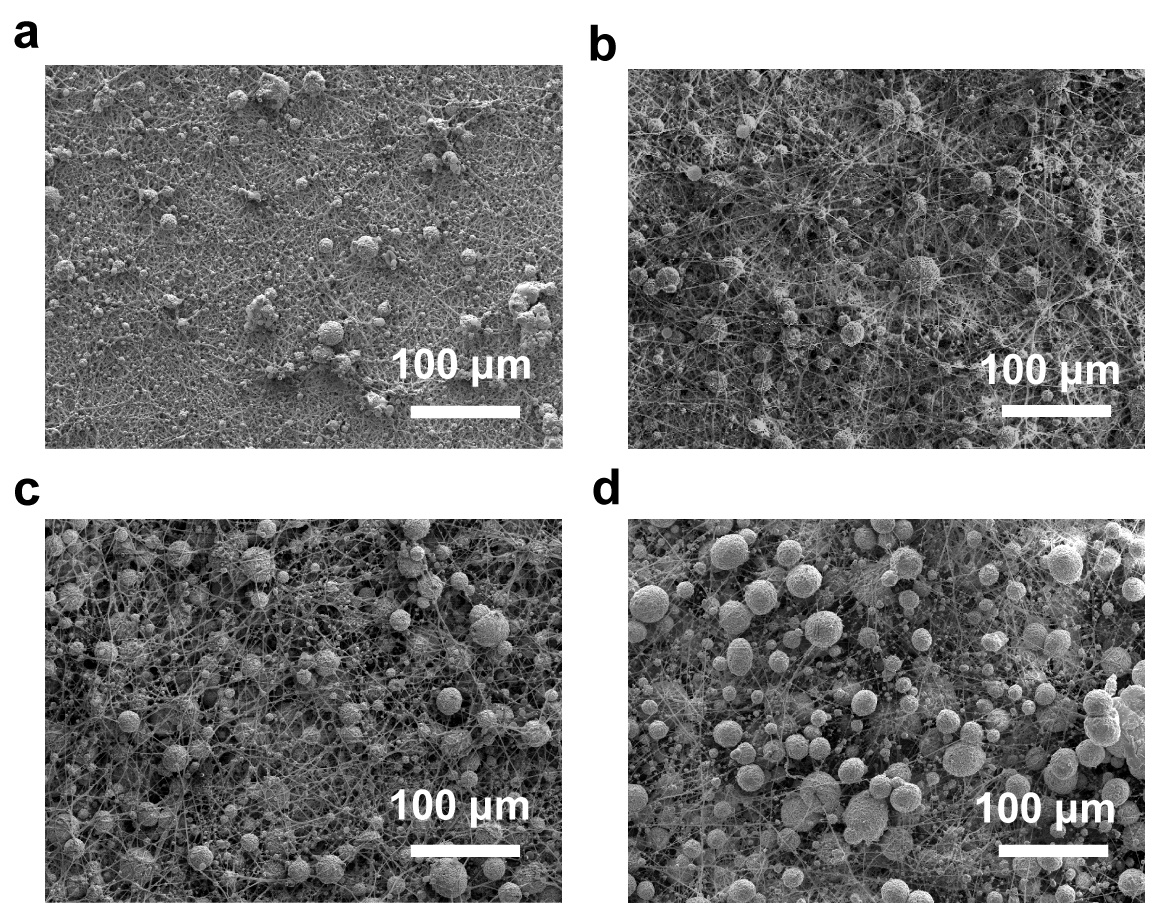


**Supplementary Figure 4. Characterization of LM nanoparticles @ TPU scaffold composite (LNSC). a**‒**d** Top-view SEM images of LNSC with different electropraying speed of LM solution, *i.e.,* 0.02 mm/min, 0.04 mm/min, 0.06 mm/min, 0.08 mm/min, respectively.


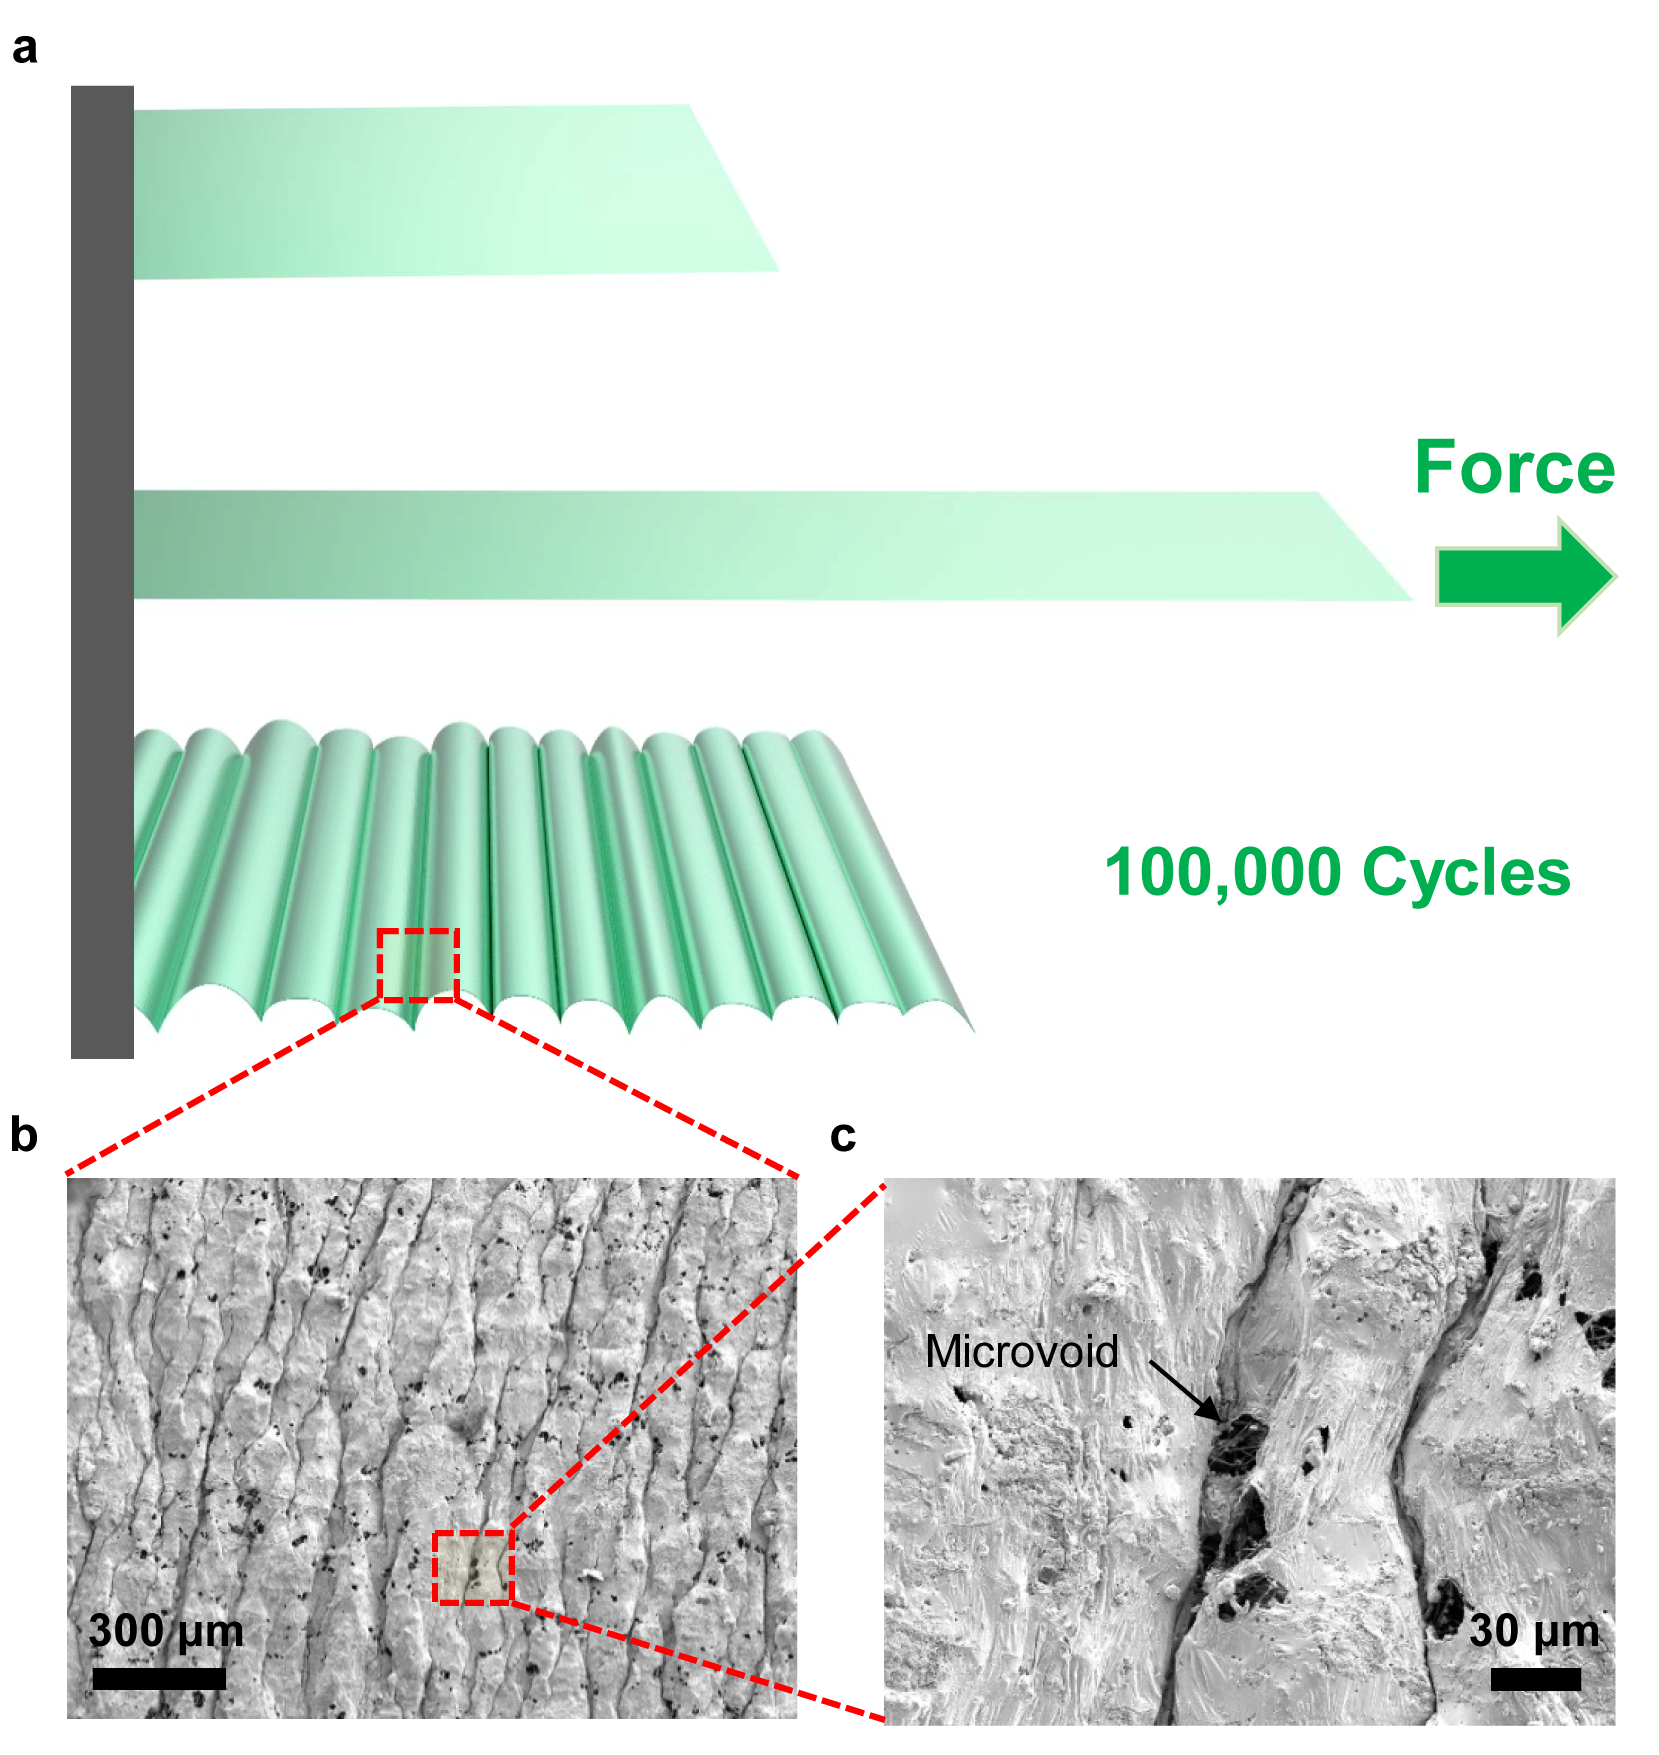


**Supplementary Figure 5. a** Schematic illustration of NHSE in unstrained, stretched, and relaxed after 100, 000 stretch cycles. **b** Top-view SEM images of NHSE after 100, 000 stretching cycles at 100% strain and (**c**)the enlarged wrinkle structure of NHSE.


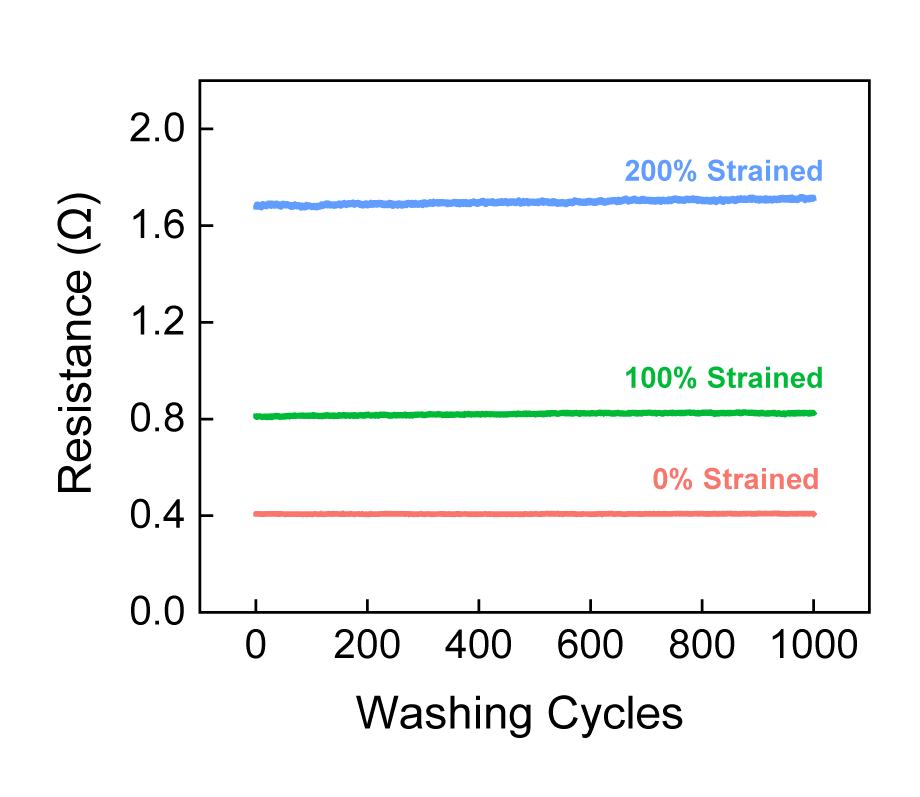


**Supplementary Figure 6.** The electrical resistance of the stretched NHSE at 100% , 200% and 300% strain under 1, 000 water washing cycles (initial sample size: 1 cm × 1 cm).


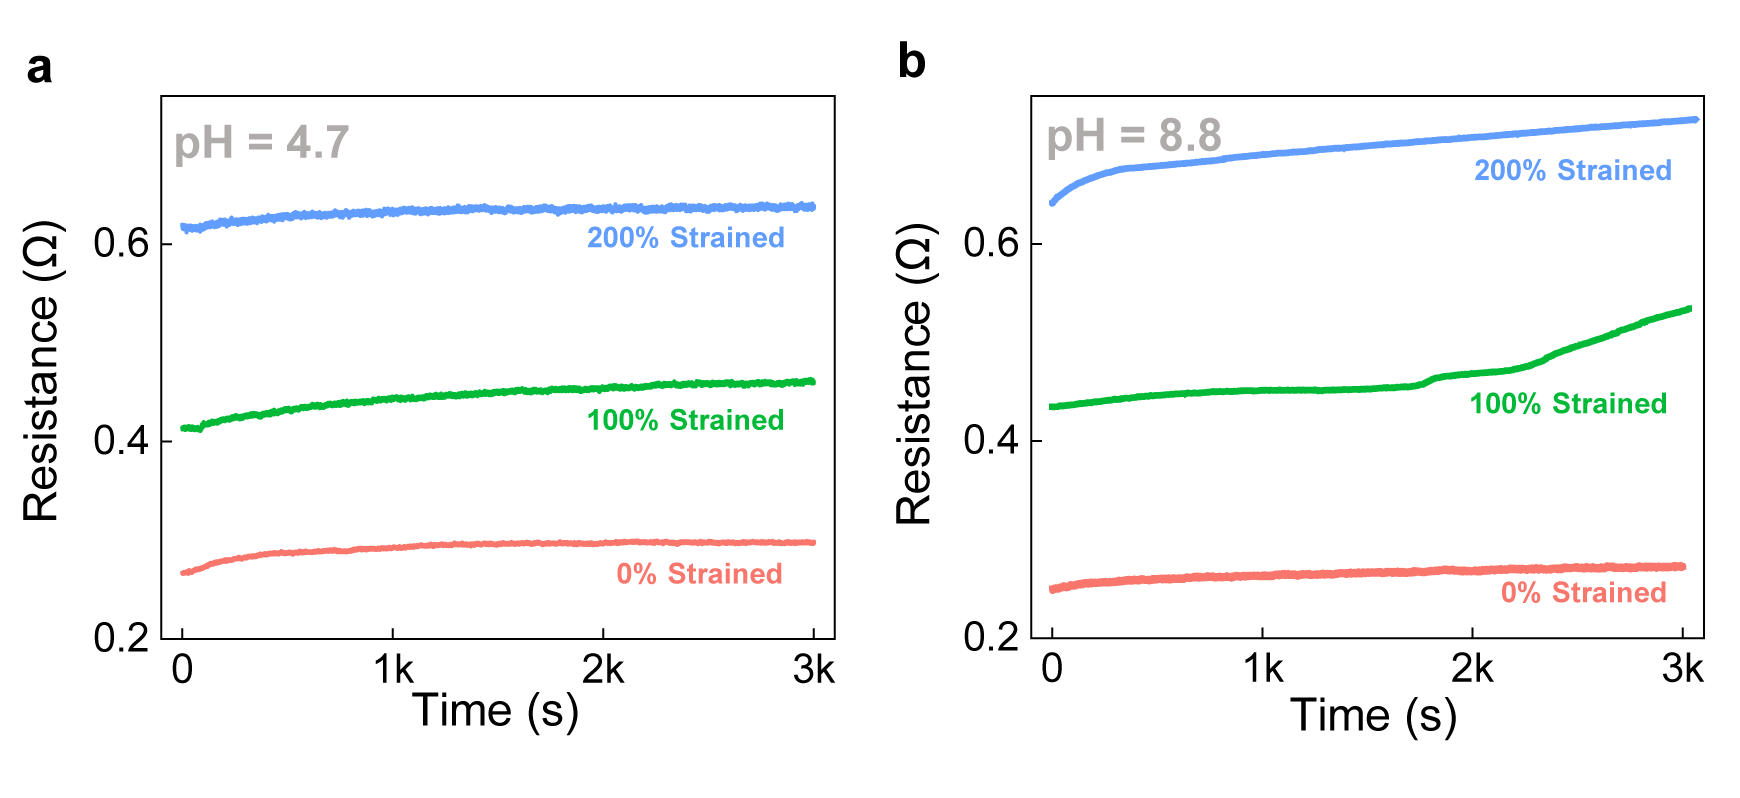


**Supplementary Figure 7. Electrical resistance variation of NHSE under external stimuli.** The resistance of the NHSE as a function of time under unstrained (0%), 100% strained, and 200% strained dipped in synthetic perspiration of (**a**) pH 4.7 and (**b**) pH 8.8, respectively.

**
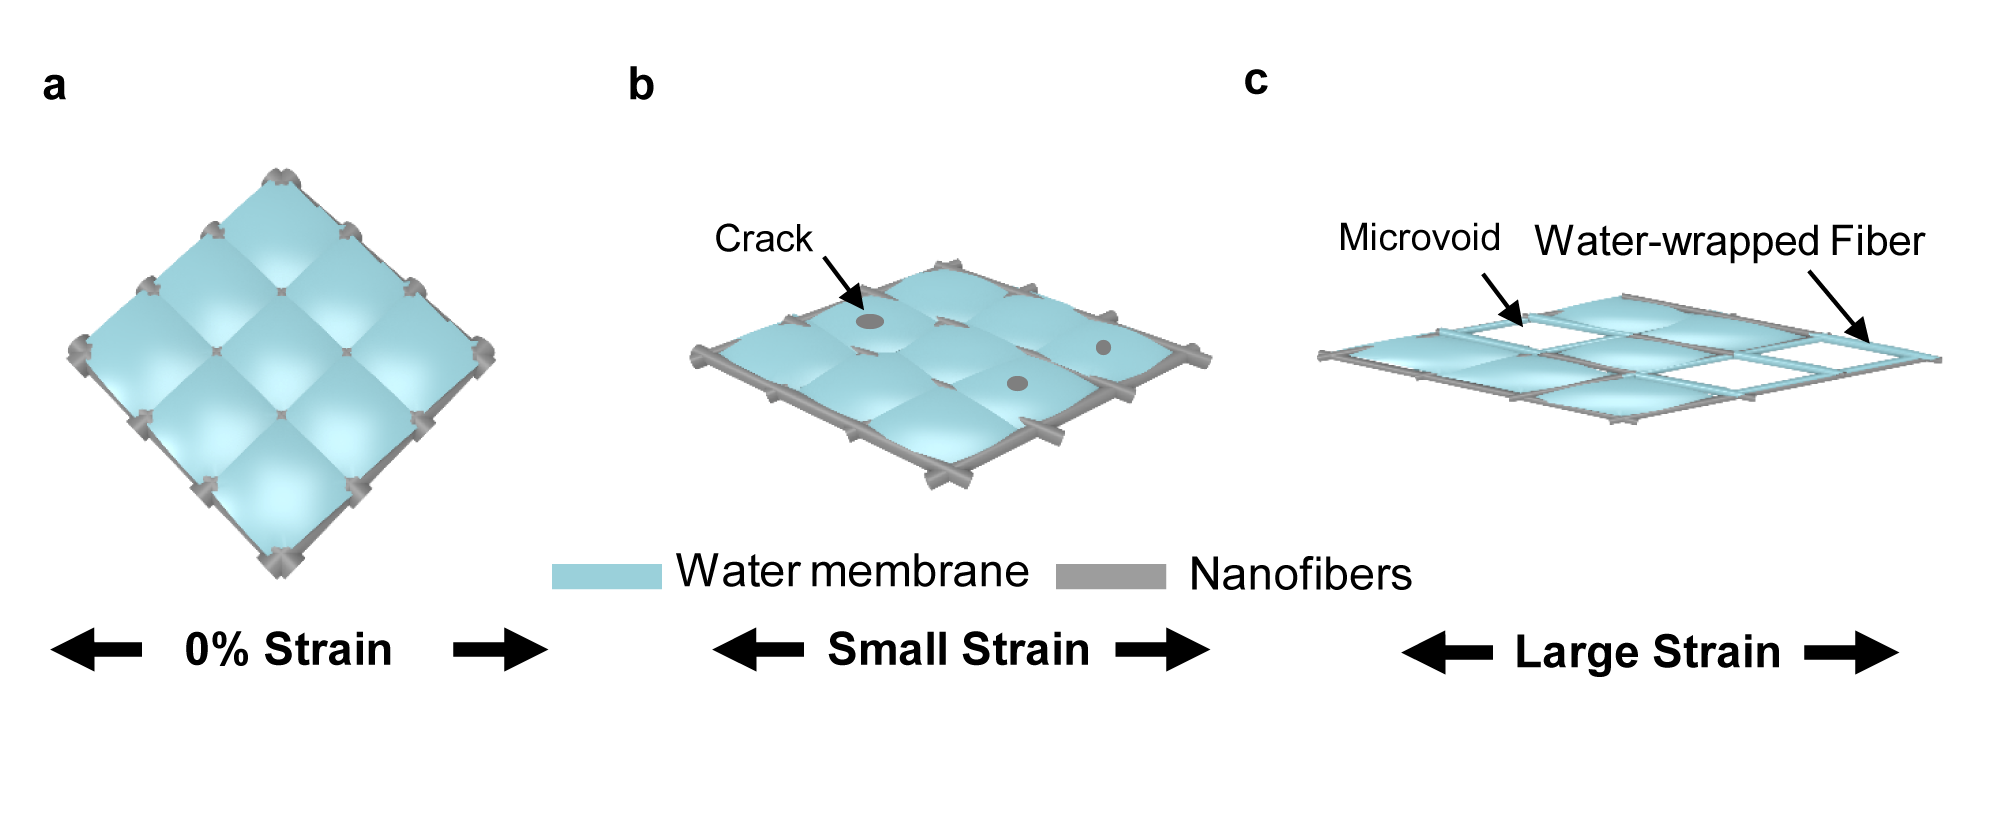
**

**Supplementary Figure 8. Schematic diagram of water membrane on fish net. a‒c** The schematic diagram of water membrane on fish-net under 0% strain, small strain and large strain, respectively.


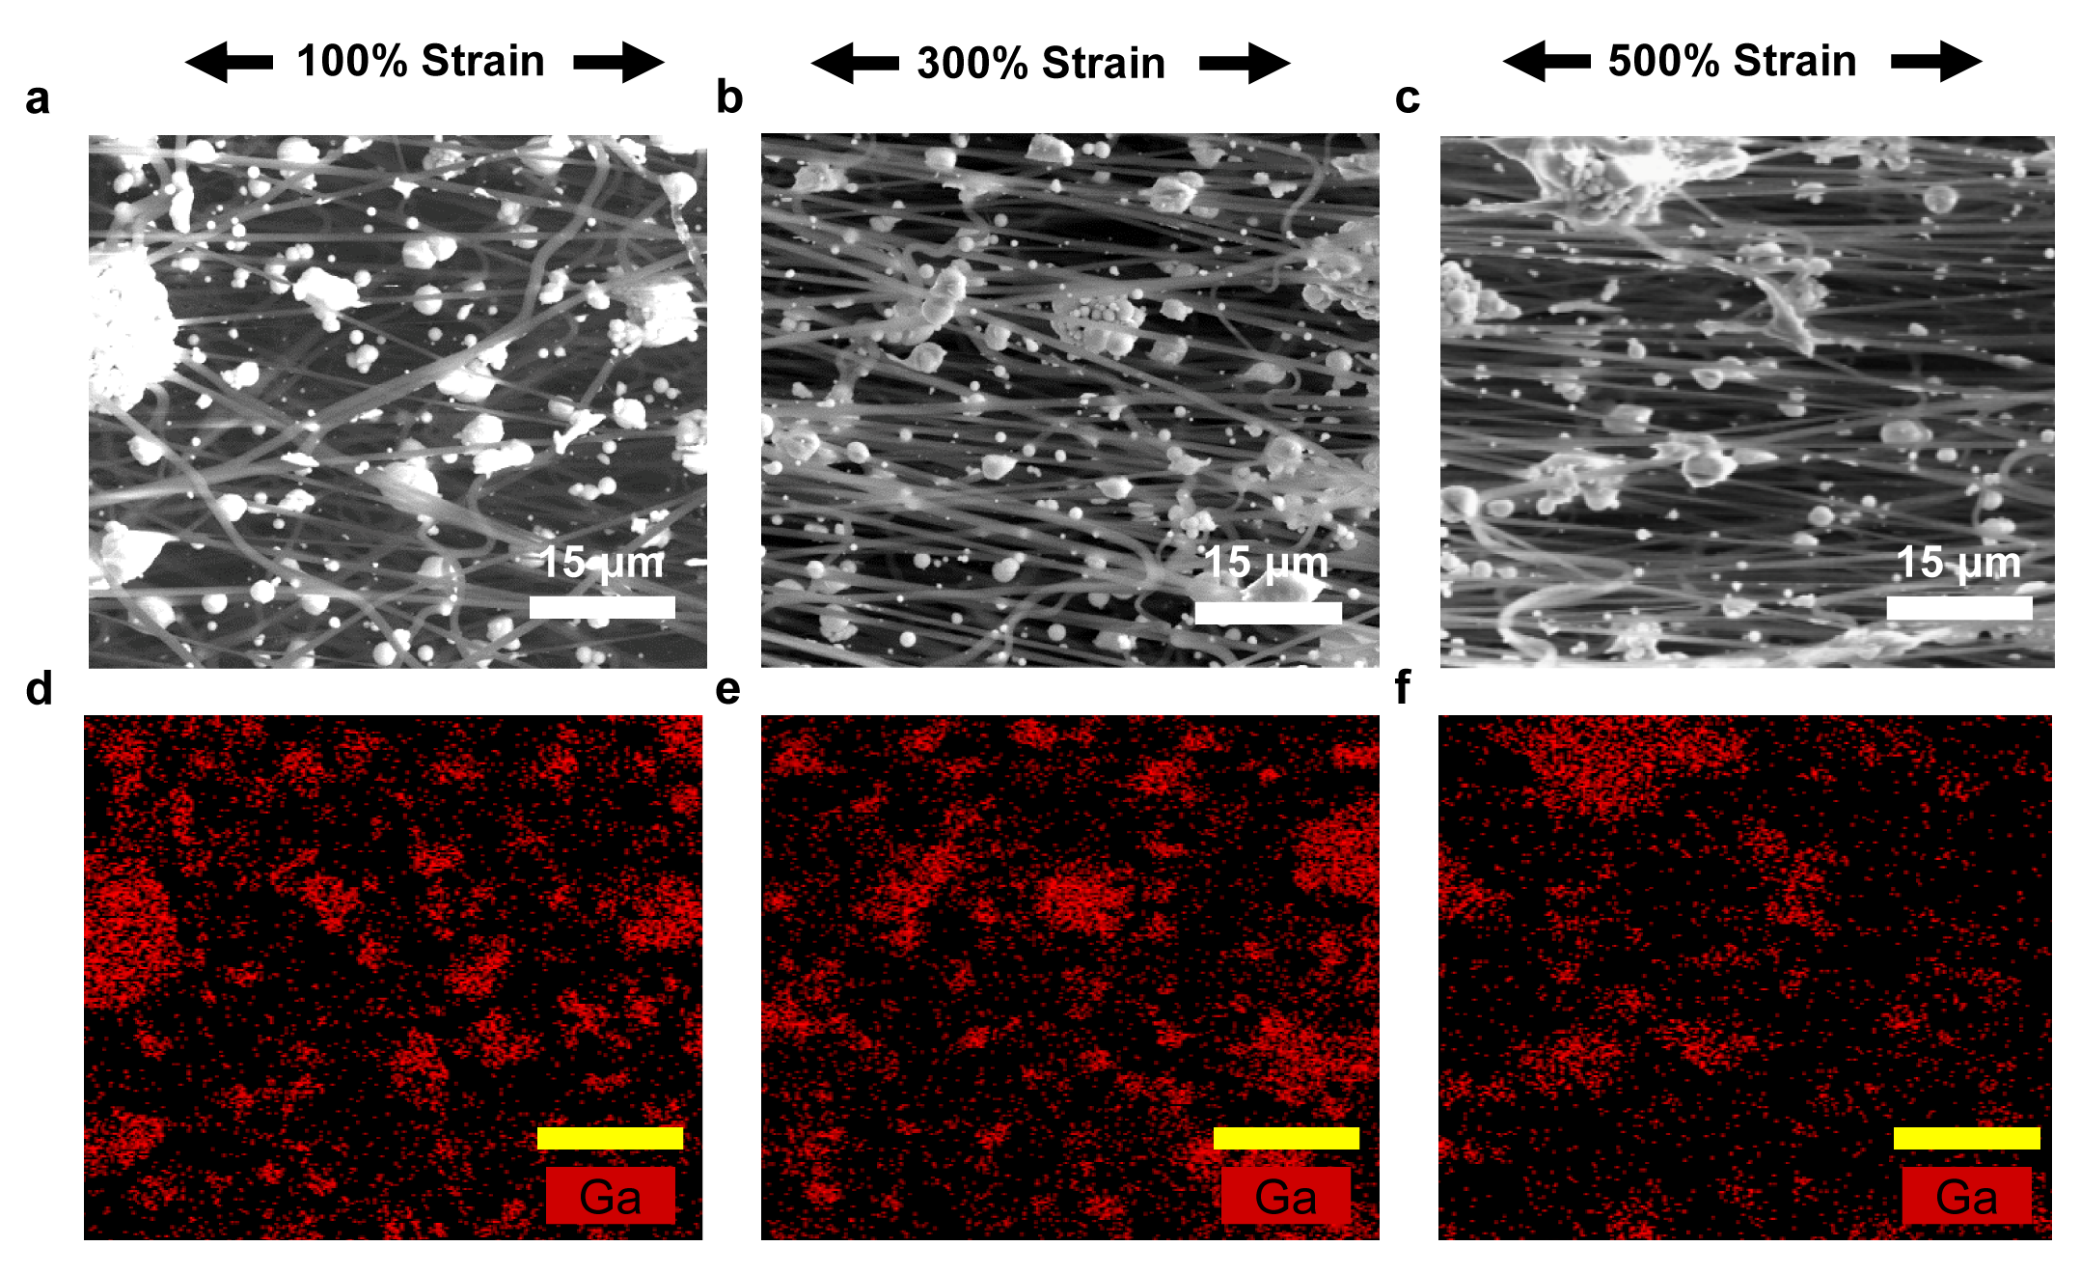


**Supplementary Figure 9. Micromorphology changes of LM nanoparticles @ TPU scaffold composite (LNSC) under different strain. a‒c** Top-View SEM of elongated LNSC under uniaxial deformation. **d‒f** Corresponding EDS mapping of Ga elements under strain of 100%, 300% and 500%, respectively.


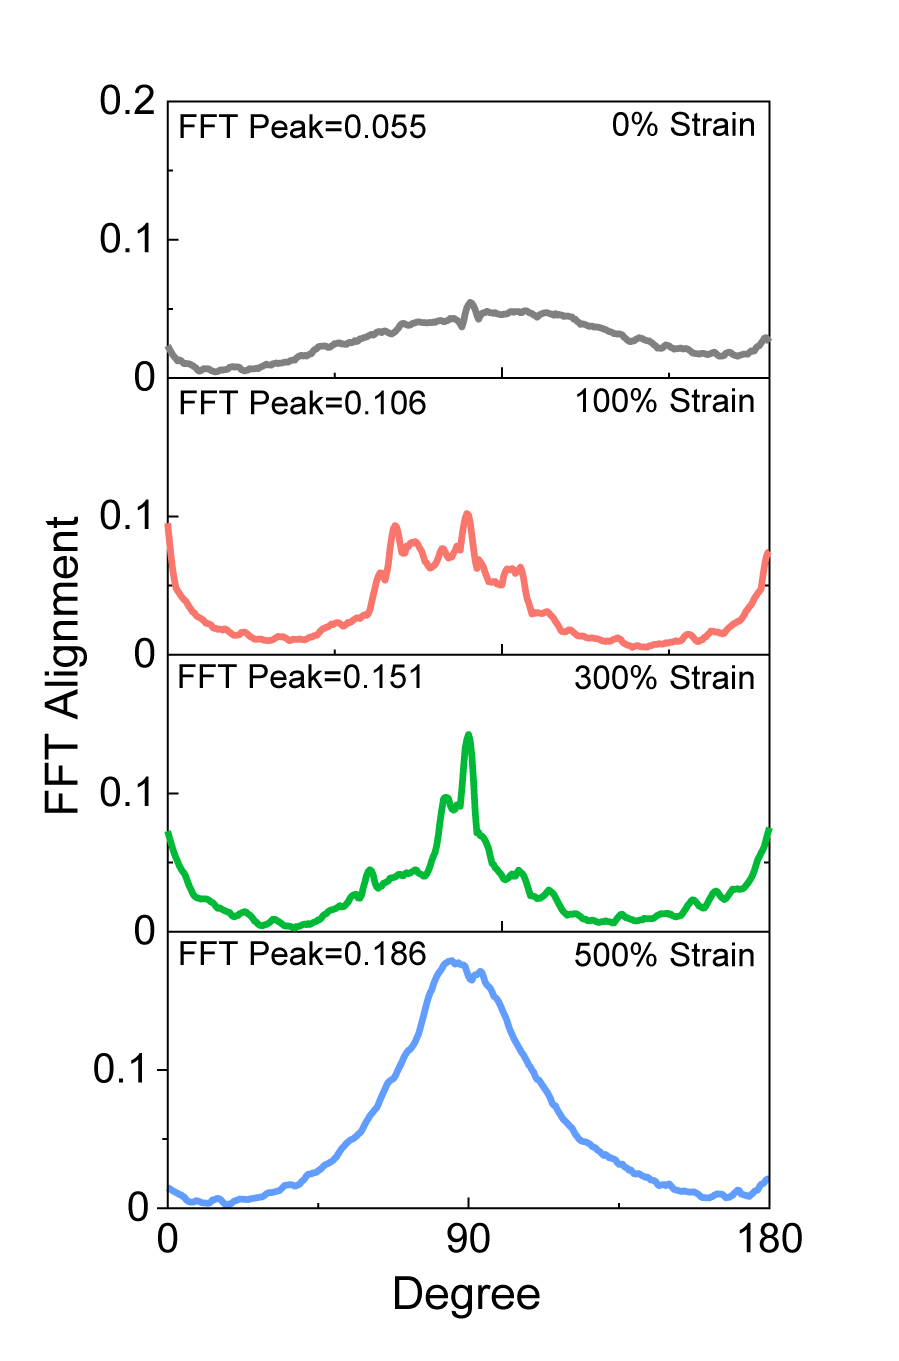


**Supplementary Figure 10. Two-dimensional FFT alignment of the NHSE under uniaxial strain of 0%, 100%, 300%, 500%, respectively.**


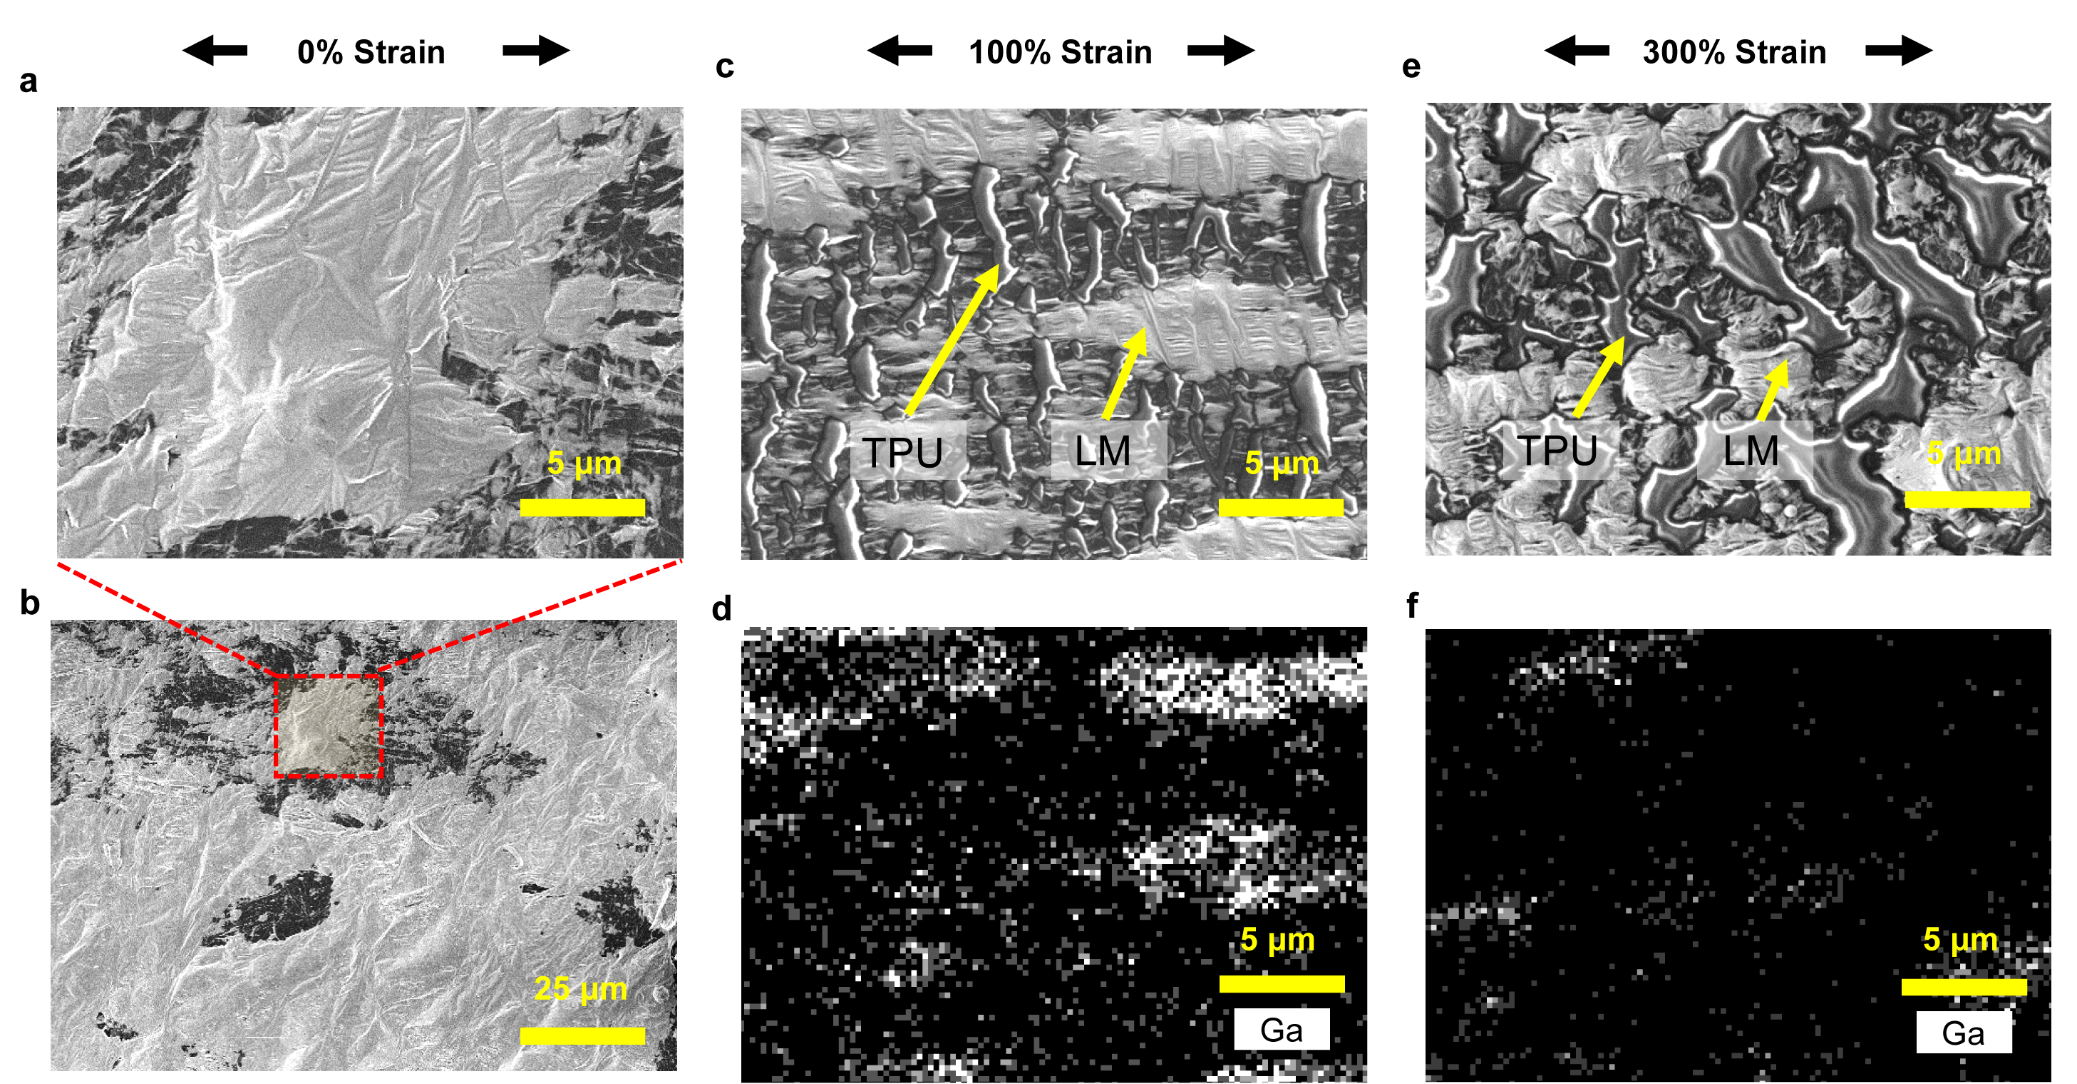


**Supplementary Figure 11. Morphology of liquid metal (LM) on pure TPU film under uniaxial elongation. a, b** The top-down view image of LM film on pure TPU film. **c‒f** Morphology of LM and TPU under strain of 100% and 300%, and the corresponding EDS mapping of Ga element.
